# Supplementary material for: Incidence of renal replacement therapy for diabetic nephropathy in the Netherlands: Dutch diabetes estimates (DUDE)-3
Source: HighWire-hosted journal article supplement (doi:10.1136/bmjopen-2014-005624), 2015-01-01
Supplement: bmjopen-2014-005624supp.pdf [file bmjopen-2014-005624supp.pdf]

**Appendix 1.** Crude incidence and prevalence rates of RRT due to DN per million population during the period 2000-2010 in the Netherlands

|                     | Year  |       |       |       |       |       |       |       |       |       |       |       |       | APC %<br>(95% CI)                                                                  |
|---------------------|-------|-------|-------|-------|-------|-------|-------|-------|-------|-------|-------|-------|-------|------------------------------------------------------------------------------------|
|                     | 2000  | 2001  | 2002  | 2003  | 2004  | 2005  | 2006  | 2007  | 2008  | 2009  | 2010  | 2011  | 2012  |                                                                                    |
| <b>Incidence</b>    |       |       |       |       |       |       |       |       |       |       |       |       |       |                                                                                    |
| All                 | 92.6  | 97.6  | 98.9  | 100.3 | 103.3 | 106.3 | 110.7 | 113.8 | 120.9 | 118.7 | 117.7 | 117.6 | 120.2 | 2000-2008: 3.0 (2.6;3.4)<br>2008-2012: 0.3 (-0.8;1.4)                              |
| Non-DN              | 58.0  | 63.1  | 64.2  | 68.1  | 67.9  | 67.4  | 69.1  | 70.6  | 75.8  | 77.3  | 71.1  | 71.2  | 71.5  | 2000-2009: 2.5 (1.7;3.4)<br>2009-2012: -2.5 (-6.8;1.9)                             |
| Unknown/<br>Missing | 19.1  | 18.3  | 17.3  | 15.1  | 16.9  | 21.4  | 22.9  | 21.6  | 22.8  | 23.1  | 27.9  | 26.3  | 29.0  | 2000-2003: -4.2 (-14.4;7.1)<br>2003-2012: 6.5 (4.4;8.7)                            |
| DN Both             | 15.6  | 16.5  | 17.3  | 16.9  | 18.7  | 17.3  | 18.8  | 21.7  | 22.2  | 18.5  | 18.7  | 20.1  | 19.6  | 2000-2012: 1.9 (0.7;3.2)                                                           |
| T1DN                | 6.8   | 6.2   | 5.1   | 5.6   | 5.7   | 5.8   | 5.9   | 5.3   | 5.1   | 3.6   | 4.5   | 4.4   | 3.6   | 2000-2012: -4.1 (-5.9;-2.4)                                                        |
| T2DN                | 8.9   | 10.3  | 12.2  | 11.3  | 13.0  | 11.6  | 12.9  | 16.4  | 17.1  | 14.9  | 14.2  | 15.7  | 16.0  | 2000-2012: 4.5 (2.7;6.2)                                                           |
| <b>Prevalence</b>   |       |       |       |       |       |       |       |       |       |       |       |       |       |                                                                                    |
| All                 | 611.6 | 628.7 | 647.3 | 666.0 | 691.3 | 721.7 | 758.0 | 785.0 | 820.2 | 855.3 | 882.7 | 911.2 | 923.4 | 2000-2003: 2.8 (2.3;3.4)<br>2003-2009: 4.2 (4.0;4.5)<br>2009-2012: 2.7 (2.1;3.2)   |
| Non-DN              | 461.5 | 473.9 | 487.3 | 500.5 | 517.0 | 533.9 | 555.7 | 570.8 | 591.4 | 613.1 | 627.2 | 641.2 | 642.4 | 2000-2003: 2.7 (2.2;3.2)<br>2003-2009: 3.4 (3.2;3.6)<br>2009-2012: 1.7 (1.3;2.2)   |
| Unknown/<br>Missing | 93.2  | 94.9  | 96.5  | 97.5  | 101.5 | 110.8 | 120.5 | 125.6 | 132.8 | 141.6 | 153.0 | 162.3 | 172.4 | 2000-2003: 1.4 (-0.6;3.4)<br>2003-2012: 6.5 (6.1;6.9)<br>2000-2009: 6.7 (6.3;7.0)  |
| DN Both             | 56.9  | 60.0  | 63.5  | 68.0  | 72.8  | 77.0  | 81.9  | 88.6  | 96.0  | 100.7 | 102.5 | 107.6 | 108.6 | 2009-2012: 2.6 (0.9;4.3)                                                           |
| T1DN                | 32.5  | 32.3  | 32.6  | 32.6  | 33.4  | 34.6  | 35.7  | 36.2  | 37.2  | 36.8  | 38.0  | 38.6  | 37.4  | 2000-2003: 0.1 (-1.6;1.9)<br>2003-2007: 3.0 (1.2;4.8)<br>2006-2012: 0.6 (-0.1;1.4) |
| T2DN                | 24.4  | 27.7  | 30.9  | 35.4  | 39.4  | 42.4  | 46.1  | 52.4  | 58.7  | 63.9  | 64.5  | 69.1  | 71.3  | 2000-2008: 11.4 (10.6;12.3)<br>2008-2012: 4.8 (2.6;7.1)                            |

Categories may not add up because of rounding off. Abbreviations: APC; annual percentage change; DN, diabetic nephropathy; T1DN, type 1 DN; T2DN, type 2 DN.

**Appendix 2.** Additional sensitivity analysis

**A.** Age and gender adjusted incidence of RRT for all causes, non-DN and DN (both T1DN and T2DN) for centres with <20% ( and ≥ 20% (green line) missing primary causes of RRT.

|                        | Year |      |      |      |      |      |      |      |      |      |      |      |      | APC % (95% CI)                                             |
|------------------------|------|------|------|------|------|------|------|------|------|------|------|------|------|------------------------------------------------------------|
|                        | 2000 | 2001 | 2002 | 2003 | 2004 | 2005 | 2006 | 2007 | 2008 | 2009 | 2010 | 2011 | 2012 |                                                            |
| <b>&lt;20% missing</b> |      |      |      |      |      |      |      |      |      |      |      |      |      |                                                            |
| All                    | 65.0 | 68.0 | 69.4 | 69.0 | 72.8 | 74.7 | 75.5 | 79.6 | 82.7 | 79.7 | 78.7 | 79.5 | 81.0 | 2000-2008: 2.7 (2.2;3.2)<br>2008-2012: -0.4 (-1.8;1.0)     |
| Non-DN                 | 43.6 | 46.3 | 47.8 | 49.2 | 50.8 | 50.7 | 51.3 | 54.0 | 57.6 | 55.2 | 53.0 | 52.9 | 53.7 | 2000-2008: 2.9 (2.2;3.6)<br>2008-2012: -1.5 (-3.4;0.5)     |
| Unknown/<br>Missing    | 9.9  | 9.5  | 8.9  | 7.5  | 8.7  | 10.5 | 10.8 | 9.8  | 9.5  | 11.0 | 11.7 | 11.6 | 12.2 | 2000-2012: 2.6 (0.9;4.2)                                   |
| DN Both                | 11.5 | 12.3 | 12.6 | 12.2 | 13.6 | 13.4 | 13.4 | 15.6 | 15.6 | 13.6 | 14.1 | 15.0 | 15.2 | 2000-2012: 2.1 (1.2;3.1)                                   |
| T1DN                   | 5.3  | 4.5  | 3.8  | 4.3  | 3.8  | 4.4  | 4.2  | 4.0  | 3.8  | 2.6  | 3.4  | 3.7  | 2.8  | 2000-2012: -3.7 (-5.7;-1.7)                                |
| T2DN                   | 6.2  | 7.9  | 8.8  | 7.9  | 9.8  | 9.0  | 9.2  | 11.7 | 11.8 | 11.0 | 10.7 | 11.3 | 12.4 | 2000-2012: 4.7 (3.1;6.3)                                   |
| <b>≥20% missing</b>    |      |      |      |      |      |      |      |      |      |      |      |      |      |                                                            |
| All                    | 27.8 | 29.7 | 29.4 | 31.2 | 30.6 | 31.5 | 35.1 | 34.4 | 38.1 | 38.8 | 39.0 | 38.1 | 39.0 | 2000-2012: 3.1 (2.5;3.7)                                   |
| Non-DN                 | 14.4 | 16.8 | 16.3 | 18.9 | 17.1 | 16.7 | 17.7 | 16.7 | 18.1 | 22.0 | 18.2 | 18.4 | 17.8 | 2000-2012: 1.5 (0.2;2.9)                                   |
| Unknown/<br>Missing    | 9.2  | 8.8  | 8.4  | 7.7  | 8.2  | 10.8 | 12.0 | 11.6 | 13.3 | 12.2 | 16.2 | 14.7 | 16.8 | 2000-2003: -3.1 (-16.0;11.9)<br>2003-2012: 8.5 (5.7;11.4)  |
| DN Both                | 4.1  | 4.2  | 4.8  | 4.7  | 5.1  | 4.0  | 5.4  | 6.2  | 6.6  | 4.8  | 4.5  | 5.2  | 4.5  | 2000-2012: 1.3 (-1.1;3.8)                                  |
| T1DN                   | 1.5  | 1.7  | 1.4  | 1.3  | 1.9  | 1.4  | 1.7  | 1.3  | 1.3  | 1.0  | 1.0  | 0.8  | 0.8  | 2000-2006: 0.5 (-6.1;7.6)<br>2006-2012: -11.4 (-17.2;-5.2) |
| T2DN                   | 2.6  | 2.4  | 3.4  | 3.5  | 3.2  | 2.6  | 3.7  | 4.8  | 5.2  | 3.9  | 3.4  | 4.4  | 3.6  | 2000-2012: 3.9 (0.7;7.1)                                   |

Categories may not add up because of rounding off. Abbreviations: APC; annual percentage change; DN, diabetic nephropathy; T1DN, type 1 DN; T2DN, type 2 DN.

**B.** Visual representation of the course of the incidence of RRT for DN (both forms) for all centres (blue line) and centres with <20% (red line) or  $\geq 20\%$  (green line) missing primary causes of RRT.

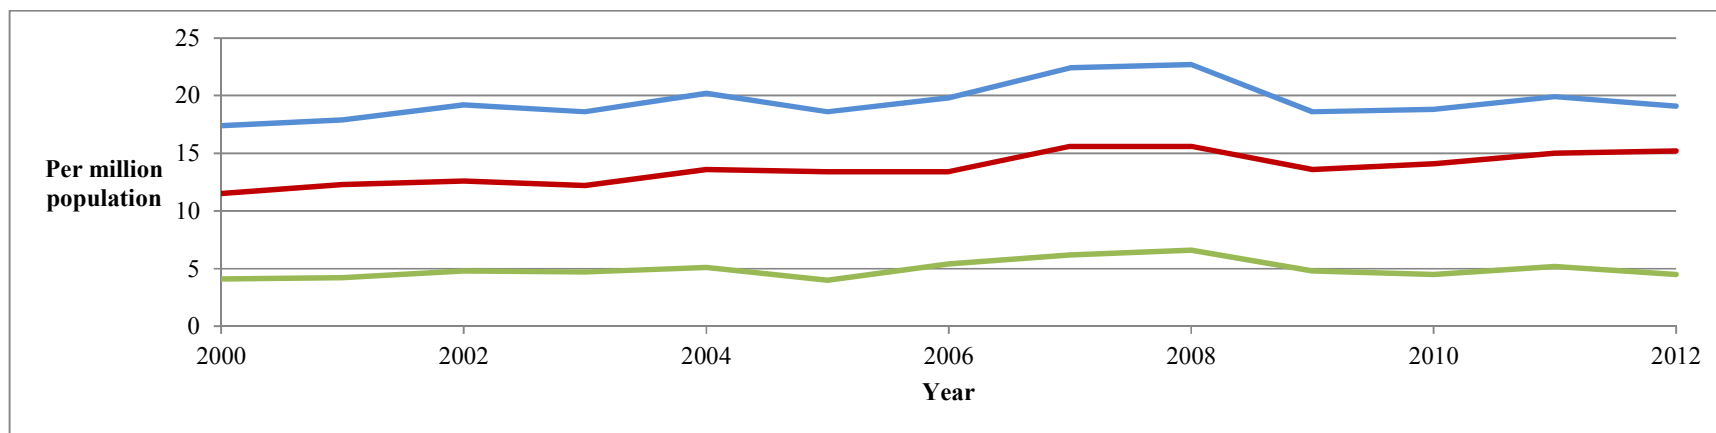

C. Visual representation of the course of the incidence of RRT for T1DN comparing all centres (blue line) and centres with <20% (red line) or  $\geq 20\%$  (green line) missing primary causes of RRT.

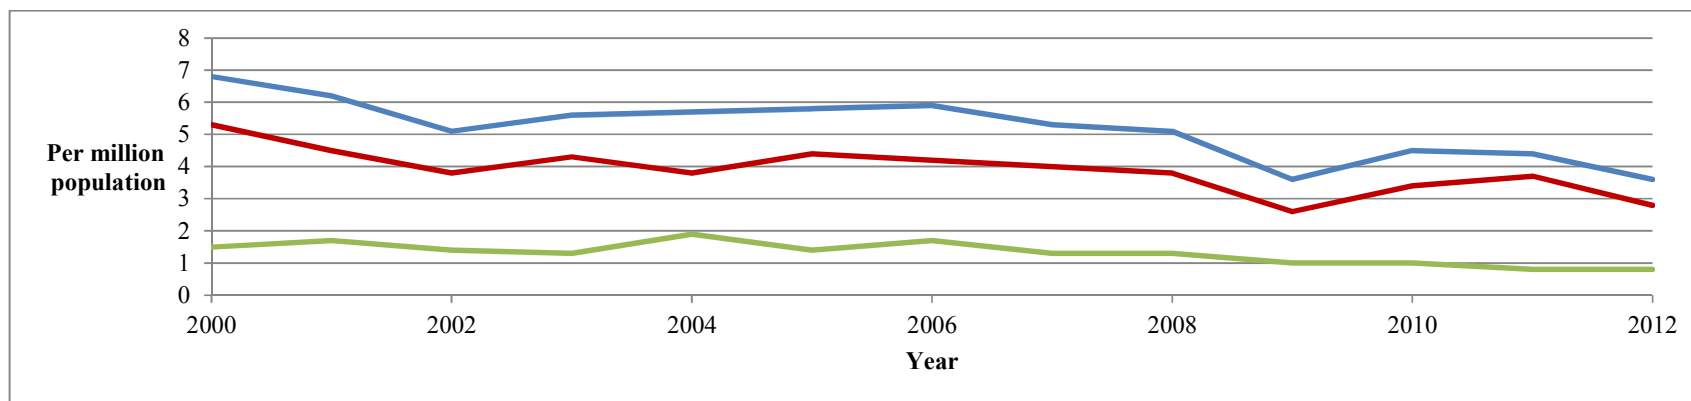

D. Visual representation of the course of the incidence of RRT for T2DN comparing all centres (blue line) and centres with <20% (red line) or  $\geq 20\%$  (green line) missing primary causes of RRT.

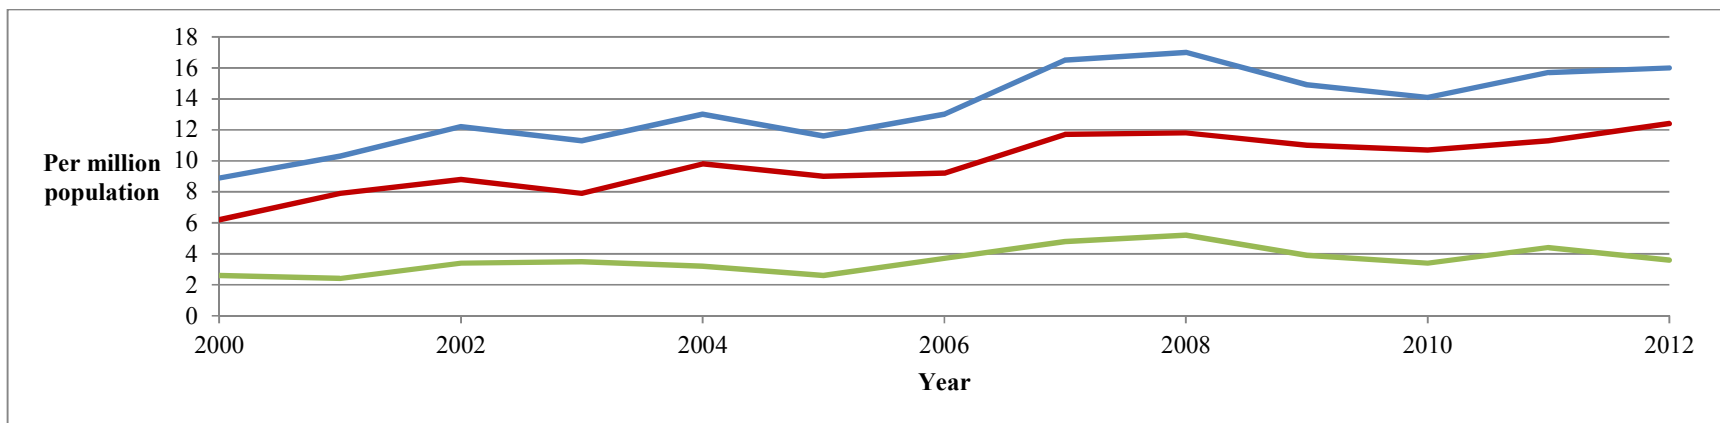

### Appendix 3.

#### A. Contribution of each treatment modality (dialysis or Tx) to the adjusted incidence of RRT due to DN.

|                            | Year |      |      |      |       |      |       |       |       |       |      |      |      | AAPC %<br>(95% CI)                                                                       |
|----------------------------|------|------|------|------|-------|------|-------|-------|-------|-------|------|------|------|------------------------------------------------------------------------------------------|
|                            | 2000 | 2001 | 2002 | 2003 | 2004  | 2005 | 2006  | 2007  | 2008  | 2009  | 2010 | 2011 | 2012 |                                                                                          |
| <b>Dialysis</b>            |      |      |      |      |       |      |       |       |       |       |      |      |      |                                                                                          |
| All                        | 90.5 | 94.9 | 97.2 | 96.3 | 100.2 | 99.5 | 103.2 | 101.4 | 104.3 | 102.6 | 98.2 | 94.5 | 96.2 | 2000-2008: 1.5 (0.8;2.2)<br>2008-2012: -2.6 (-4.5;-0.6)                                  |
| Non-DN                     | 56.4 | 60.6 | 62.8 | 65.1 | 65.7  | 63.2 | 65.6  | 62.8  | 66.2  | 66.2  | 62.1 | 59.1 | 58.9 | 2000-2003: 4.4 (-0.1;9.1)<br>2003-2009: 0.0 (-2.0;2.0)<br>2009-2012: -3.7 (-7.8;0.7)     |
| Unknown/<br>Missing        | 17.7 | 17.6 | 16.8 | 13.7 | 15.5  | 19.1 | 19.1  | 17.6  | 16.9  | 18.9  | 19.1 | 17.6 | 19.8 | 2000-2012: 1.2 (-0.3;2.8)                                                                |
| DN Both                    | 16.5 | 16.7 | 17.5 | 17.5 | 18.9  | 17.1 | 18.4  | 21.1  | 21.2  | 17.4  | 17.0 | 17.9 | 17.5 | 2000-2012: 0.6 (-0.8;1.9)                                                                |
| T1DN                       | 6.9  | 5.8  | 4.7  | 5.5  | 5.5   | 5.5  | 5.3   | 5.1   | 4.6   | 3.1   | 3.5  | 3.2  | 2.9  | 2000-2012: -6.1 (-8.1;-4.1)                                                              |
| T2DN                       | 9.6  | 10.8 | 12.8 | 12.1 | 13.5  | 11.6 | 13.2  | 16.0  | 16.6  | 14.3  | 13.5 | 14.6 | 14.6 | 2000-2012: 3.1 (1.3;4.8)                                                                 |
| <b>Haemodialysis</b>       |      |      |      |      |       |      |       |       |       |       |      |      |      |                                                                                          |
| All                        | 58.4 | 60.8 | 69.0 | 68.4 | 75.4  | 75.2 | 76.9  | 77.5  | 78.6  | 80.1  | 76.2 | 76.1 | 78.2 | 2000-2004: 6.9 (3.9;9.9)<br>2004-2012: 0.4 (-0.5;1.4)                                    |
| Non-DN                     | 36.1 | 37.6 | 43.4 | 45.2 | 49.3  | 47.0 | 47.5  | 46.9  | 49.3  | 50.9  | 47.5 | 47.9 | 47.4 | 2000-2004: 7.7 (4.4;11.2)<br>2004-2012: -0.1 (-1.2;1.0)                                  |
| Unknown/<br>Missing        | 11.6 | 11.9 | 12.6 | 10.4 | 12.0  | 14.4 | 15.2  | 13.5  | 12.6  | 14.6  | 15.7 | 14.1 | 16.1 | 2000-2012: 2.6 (1.2;4.1)                                                                 |
| DN Both                    | 10.7 | 11.3 | 13.0 | 12.8 | 14.1  | 13.8 | 14.2  | 17.2  | 16.7  | 14.5  | 13.0 | 14.1 | 14.7 | 2000-2007: 5.7 (2.7;8.8)<br>2007-2012: -3.2 (-7.7;1.6)                                   |
| T1DN                       | 3.7  | 3.4  | 2.8  | 3.7  | 3.5   | 4.0  | 3.9   | 3.8   | 3.5   | 2.2   | 2.1  | 2.5  | 2.5  | 2000-2007: 2.5 (-3.2;8.4)<br>2007-2010: -19.3 (-47;22.9)<br>2010-2012: 12.6 (-26.1;71.5) |
| T2DN                       | 7.1  | 7.9  | 10.2 | 9.0  | 10.6  | 9.8  | 10.3  | 13.3  | 13.2  | 12.4  | 10.9 | 11.6 | 12.2 | 2000-2012: 4.0 (2.0;6.0)                                                                 |
| <b>Peritoneal dialysis</b> |      |      |      |      |       |      |       |       |       |       |      |      |      |                                                                                          |

|                     |      |      |      |      |      |      |      |      |      |      |      |      |      |                                                             |
|---------------------|------|------|------|------|------|------|------|------|------|------|------|------|------|-------------------------------------------------------------|
| All                 | 32.1 | 34.1 | 28.2 | 28.0 | 24.7 | 24.2 | 26.3 | 23.9 | 25.7 | 22.5 | 22.0 | 18.5 | 18.0 | 2000-2012: -4.4 (-5.5;-3.2)                                 |
| Non-DN              | 20.2 | 22.9 | 19.4 | 19.9 | 16.5 | 16.3 | 18.1 | 15.9 | 16.9 | 15.3 | 14.6 | 11.2 | 11.5 | 2000-2012: -4.8 (-6.1;-3.3)                                 |
| Unknown/<br>Missing | 6.1  | 5.8  | 4.2  | 3.3  | 3.5  | 4.6  | 3.9  | 4.1  | 4.3  | 4.4  | 3.4  | 3.5  | 3.7  | 2000-2012: -2.8 (-5.4;-0.2)                                 |
| DN Both             | 5.7  | 5.4  | 4.6  | 4.8  | 4.8  | 3.3  | 4.3  | 3.9  | 4.6  | 2.9  | 4.0  | 3.8  | 2.8  | 2000-2012: -4.3 (-6.5;-2)                                   |
| T1DN                | 3.2  | 2.5  | 1.9  | 1.7  | 2.0  | 1.6  | 1.3  | 1.3  | 1.1  | 0.9  | 1.4  | 0.7  | 0.4  | 2000-2012: -12.1 (-15.3;-8.6)                               |
| T2DN                | 2.5  | 2.9  | 2.6  | 3.0  | 2.8  | 1.8  | 2.9  | 2.6  | 3.4  | 2.0  | 2.6  | 3.0  | 2.4  | 2000-2012: -0.3 (-3.2;2.7)                                  |
| <b>Tx</b>           |      |      |      |      |      |      |      |      |      |      |      |      |      |                                                             |
| All                 | 4.6  | 3.5  | 3.9  | 4.4  | 4.6  | 6.4  | 7.7  | 8.3  | 10.8 | 11.4 | 13.1 | 12.9 | 14.3 | 2000-2002: -9.2 (-29.2;16.4)<br>2002-2008: 19.9 (13.4;26.7) |
| Non-DN              | 2.1  | 0.8  | 0.6  | 1.6  | 1.7  | 2.9  | 3.9  | 2.6  | 4.4  | 2.8  | 6.7  | 5.9  | 7.0  | 2000-2012: 18.1 (10.3;26.5)                                 |
| Unknown/<br>Missing | 0.0  | 0.0  | 0.0  | 0.1  | 0.1  | 0.1  | 0.0  | 0.1  | 0.1  | 0.1  | 0.2  | 0.1  | 0.2  | -                                                           |
| DN Both             | 2.2  | 2.3  | 2.9  | 2.6  | 2.6  | 3.1  | 3.4  | 5.4  | 6.0  | 8.1  | 5.3  | 5.7  | 6.5  | 2000-2012: 11.1 (7.6;14.6)                                  |
| T1DN                | 0.3  | 0.4  | 0.4  | 0.2  | 0.2  | 0.2  | 0.4  | 0.2  | 0.3  | 0.4  | 0.9  | 1.1  | 0.6  | 2000-2012: 8.8 (0.6;17.7)                                   |
| T2DN                | 0.3  | 0.4  | 0.4  | 0.2  | 0.3  | 0.4  | 0.4  | 0.3  | 0.3  | 0.5  | 1.0  | 1.2  | 0.8  | 2000-2012: 10.1 (3.4;17.2)                                  |

Categories may not add up because of rounding off. Abbreviations: APC; annual percentage change; DN, diabetic nephropathy; T1DN, type 1 DN; T2DN, type 2 DN.

**B. Contribution of each treatment modality (dialysis or Tx) to the adjusted prevalence of RRT due to DN.**

|                            | Year  |       |       |       |       |       |       |       |       |       |       |       |       | AAPC %<br>(95% CI)                                                                   |
|----------------------------|-------|-------|-------|-------|-------|-------|-------|-------|-------|-------|-------|-------|-------|--------------------------------------------------------------------------------------|
|                            | 2000  | 2001  | 2002  | 2003  | 2004  | 2005  | 2006  | 2007  | 2008  | 2009  | 2010  | 2011  | 2012  |                                                                                      |
| <b>Dialysis</b>            |       |       |       |       |       |       |       |       |       |       |       |       |       |                                                                                      |
| All                        | 333.6 | 334.4 | 343.9 | 348.1 | 353.3 | 361.9 | 375.9 | 375.0 | 383.5 | 393.8 | 390.9 | 384.9 | 378.2 | 2000-2009: 2 (1.7;2.2)<br>2009-2012: -1.1 (-2.4;0.2)                                 |
| Non-DN                     | 228.4 | 230.9 | 237.8 | 241.2 | 242.7 | 245.4 | 254.6 | 250.4 | 253.6 | 259.0 | 256.1 | 250.1 | 244.2 | 2000-2009: 1.4 (1.1;1.7)<br>2009-2012: -2 (-3.6;-0.3)                                |
| Unknown/<br>Missing        | 62.2  | 59.3  | 58.7  | 55.2  | 55.4  | 59.8  | 61.8  | 62.0  | 62.5  | 66.3  | 68.3  | 67.4  | 68.5  | 2000-2003: -3.4 (-7;0.3)<br>2003-2012: 2.5 (1.8;3.2)                                 |
| DN Both                    | 42.9  | 44.2  | 47.5  | 51.7  | 55.2  | 56.7  | 59.5  | 62.6  | 67.4  | 68.6  | 66.5  | 67.5  | 65.5  | 2000-2008: 5.9 (5.2;6.6)<br>2008-2012: -0.5 (-2.3;1.4)                               |
| T1DN                       | 17.7  | 16.5  | 16.2  | 16.0  | 16.6  | 16.5  | 16.5  | 15.4  | 15.6  | 14.7  | 14.9  | 14.1  | 12.4  | 2000-2010: -1.3 (-2.1;-0.5)<br>2010-2012: -8.6 (-17.4;1.3)                           |
| T2DN                       | 25.2  | 27.7  | 31.3  | 35.7  | 38.7  | 40.3  | 43.1  | 47.2  | 51.8  | 53.9  | 51.6  | 53.4  | 53.1  | 2000-2003: 12.5 (8.9;16.3)<br>2003-2009: 7.2 (5.6;8.8)<br>2009-2012: -0.7 (-3.9;2.6) |
| <b>Haemodialysis</b>       |       |       |       |       |       |       |       |       |       |       |       |       |       |                                                                                      |
| All                        | 236.1 | 233.1 | 244.9 | 252.5 | 266.0 | 276.5 | 292.1 | 295.8 | 308.1 | 322.3 | 322.2 | 325.1 | 321.5 | 2000-2009: 3.8 (3.3;4.3)<br>2009-2012: 0.2 (-2.4;2.9)                                |
| Non-DN                     | 160.7 | 159.6 | 167.5 | 172.3 | 180.3 | 185.5 | 195.6 | 194.5 | 202.0 | 210.8 | 210.0 | 210.2 | 206.9 | 2000-2009: 3.3 (2.8;3.7)<br>2009-2012: -0.4 (-2.7;2)                                 |
| Unknown/<br>Missing        | 44.4  | 41.7  | 42.3  | 41.1  | 42.8  | 46.1  | 48.7  | 49.3  | 49.8  | 53.2  | 56.0  | 56.6  | 57.6  | 2000-2003: -1.3 (-4.9;2.5)<br>2003-2012: 3.9 (3.2;4.6)                               |
| DN Both                    | 31.0  | 31.9  | 35.1  | 39.1  | 42.8  | 44.9  | 47.8  | 51.9  | 56.4  | 58.3  | 56.3  | 58.4  | 57.1  | 2000-2008: 8.1 (7.2;8.9)<br>2008-2012: 0.4 (-1.8;2.7)                                |
| T1DN                       | 11.3  | 10.6  | 10.7  | 11.0  | 11.6  | 11.7  | 12.7  | 12.6  | 12.7  | 11.9  | 11.5  | 11.5  | 10.3  | 2000-2008: 2.3 (0.9;3.7)<br>2008-2012: -4.6 (-8.3;-0.8)                              |
| T2DN                       | 19.6  | 21.3  | 24.4  | 28.1  | 31.2  | 33.2  | 35.2  | 39.3  | 43.7  | 46.4  | 44.8  | 46.9  | 46.7  | 2000-2008: 10.5 (9.3;11.8)<br>2008-2012: 1.4 (-1.9;4.9)                              |
| <b>Peritoneal dialysis</b> |       |       |       |       |       |       |       |       |       |       |       |       |       |                                                                                      |
| All                        | 97.5  | 101.2 | 99.0  | 95.6  | 87.4  | 85.3  | 83.8  | 79.2  | 75.4  | 71.6  | 68.7  | 59.8  | 56.6  | 2000-2002: 0.3 (-6;7)<br>2002-2010: -4.6 (-5.4;-3.7)                                 |



|                     |       |       |       |       |       |       |       |       |       |       |       |       |       |                                                                                            |
|---------------------|-------|-------|-------|-------|-------|-------|-------|-------|-------|-------|-------|-------|-------|--------------------------------------------------------------------------------------------|
|                     |       |       |       |       |       |       |       |       |       |       |       |       |       | 2010-2012: -9.6 (-15.3;-3.6)                                                               |
| Non-DN              | 67.7  | 71.3  | 70.3  | 68.9  | 62.4  | 59.8  | 58.9  | 55.9  | 51.6  | 48.2  | 46.1  | 39.9  | 37.3  | 2000-2002: 2.3 (-5.9;11.3)<br>2002-2010: -5.4 (-6.4;-4.3)<br>2010-2012: -10.7 (-17.9;-2.8) |
| Unknown/<br>Missing | 17.8  | 17.6  | 16.3  | 14.2  | 12.5  | 13.7  | 13.1  | 12.6  | 12.7  | 13.1  | 12.3  | 10.8  | 10.9  | 2000-2012: -3.7 (-4.7;-2.6)                                                                |
| DN Both             | 12.0  | 12.3  | 12.3  | 12.5  | 12.4  | 11.8  | 11.7  | 10.6  | 11.0  | 10.3  | 10.3  | 9.1   | 8.4   | 2000-2003: 1.5 (-3.1;6.4)<br>2003-2010: -3.1 (-4.6;-1.5)<br>2010-2012: -9.1 (-17.3;-0.2)   |
| T1DN                | 6.4   | 5.9   | 5.5   | 5.0   | 5.0   | 4.7   | 3.8   | 2.7   | 3.0   | 2.8   | 3.5   | 2.6   | 2.0   | 2000-2012: -8.5 (-10.4;-6.6)                                                               |
| T2DN                | 5.6   | 6.4   | 6.8   | 7.6   | 7.4   | 7.1   | 7.9   | 7.9   | 8.1   | 7.5   | 6.8   | 6.4   | 6.4   | 2000-2007: 4.5 (2.1;7)<br>2007-2012: -5.4 (-9.1;-1.6)                                      |
| <b>Tx</b>           |       |       |       |       |       |       |       |       |       |       |       |       |       |                                                                                            |
| All                 | 316.6 | 321.3 | 337.3 | 349.4 | 366.3 | 384.2 | 402.2 | 423.0 | 443.0 | 460.2 | 480.2 | 498.6 | 521.0 | 2000-2012: 4.4 (4.3;4.6)                                                                   |
| Non-DN              | 259.3 | 260.9 | 272.2 | 280.1 | 292.9 | 303.9 | 313.3 | 327.7 | 340.6 | 351.4 | 361.2 | 370.3 | 380.6 | 2000-2009: 3.6 (3.4;3.9)<br>2009-2012: 2.8 (1.2;4.3)                                       |
| Unknown/<br>Missing | 38.9  | 41.3  | 44.9  | 48.7  | 51.9  | 56.5  | 63.7  | 67.4  | 73.0  | 76.9  | 84.6  | 92.1  | 101.4 | 2000-2012: 8.3 (8.1;8.6)                                                                   |
| DN Both             | 18.3  | 19.0  | 20.2  | 20.6  | 21.4  | 23.8  | 25.2  | 28.0  | 29.4  | 31.9  | 34.4  | 36.2  | 39.0  | 2000-2004: 4.6 (3.3;5.9)<br>2004-2012: 7.7 (7.2;8.1)                                       |
| T1DN                | 15.7  | 16.1  | 16.9  | 17.0  | 17.0  | 18.1  | 19.0  | 20.4  | 20.7  | 21.0  | 21.8  | 22.5  | 23.5  | 2000-2012: 3.5 (3.2;3.8)                                                                   |
| T2DN                | 2.6   | 2.9   | 3.2   | 3.7   | 4.4   | 5.7   | 6.3   | 7.5   | 8.7   | 10.8  | 12.5  | 13.7  | 15.5  | 2000-2002: 10.7 (-2.7;26)<br>2002-2010: 18.7 (16.6;20.7)<br>2010-2012: 10.7 (-2.7;26)      |

Categories may not add up because of rounding off. Abbreviations: APC; annual percentage change; DN, diabetic nephropathy; T1DN, type 1 DN; T2DN, type 2 DN.

#### Appendix 4.

A. Patient survival probabilities and crude hazard ratios (HR) and age and gender adjusted HRs of patients starting RRT, subdivided into haemo- and peritoneal dialysis in the period 2000-2010.

|                                        |         | <b>Adjusted 1 year survival (95% CI)</b> | <b>Adjusted 5 year survival (95% CI)</b> | <b>Unadjusted 5 year survival (95% CI)</b> | <b>Crude HR (95%CI)</b> | <b>Adjusted HR (95% CI)</b> |
|----------------------------------------|---------|------------------------------------------|------------------------------------------|--------------------------------------------|-------------------------|-----------------------------|
| <b>Survival on haemodialysis</b>       | No DN   | 86.6 (85.9 - 87.4)                       | 50.9 (49.5 - 52.5)                       | 39.8 (39.3 - 40.3)                         | 1 (ref)                 | 1 (ref)                     |
|                                        | DN both | 85.7 (84.4 - 87.0)                       | 42.9 (40.7 - 45.3)                       | 34.0 (33.2 - 34.7)                         | 1.13 (1.07 - 1.20)      | 1.22 (1.15 - 1.29)          |
|                                        | T1DN    | 83.1 (80.2 - 86.2)                       | 34.0 (29.8 - 38.8)                       | 32.7 (31.3 - 34.1)                         | 1.17 (1.06 - 1.30)      | 1.55 (1.40 - 1.72)          |
|                                        | T2DN    | 86.5 (85.1 - 87.9)                       | 45.6 (43.0 - 48.3)                       | 34.4 (33.5 - 35.2)                         | 1.12 (1.05 - 1.19)      | 1.13 (1.06 - 1.21)          |
| <b>Survival on peritoneal dialysis</b> | No DN   | 93.6 (92.6 - 94.6)                       | 61.4 (58.8 - 64.0)                       | 59.7 (58.3 - 61.1)                         | 1 (ref)                 | 1 (ref)                     |
|                                        | DN both | 88.9 (86.6 - 91.2)                       | 42.3 (37.9 - 47.1)                       | 38.9 (37.2 - 40.6)                         | 1.88 (1.67 - 2.12)      | 1.84 (1.63 - 2.08)          |
|                                        | T1DN    | 83.0 (78.0 - 88.3)                       | 32.0 (25.1 - 40.8)                       | 41.0 (38.0 - 44.0)                         | 1.94 (1.61 - 2.32)      | 2.53 (2.10 - 3.04)          |
|                                        | T2DN    | 91.3 (88.9 - 93.8)                       | 46.8 (41.6 - 52.7)                       | 37.8 (35.7 - 39.8)                         | 1.86 (1.61 - 2.14)      | 1.61 (1.39 - 1.85)          |

Categories may not add up because of rounding off. Abbreviations: CI, confidence interval; DN, diabetic nephropathy; HR, hazard ratios; T1DN, type 1 DN; T2DN, type 2 DN.

**B.** Age and gender adjusted hazard ratios (HR) of patients starting RRT in 2005-2009 when compared to 2000-2004. Subdivided into RRT (both dialysis and kidney transplantation), dialysis (both haemo- and peritoneal dialysis) haemodialysis, peritoneal dialysis and kidney transplantation.

|                     | <b>Survival on RRT</b><br>Adjusted HR (95% CI) | <b>Survival on dialysis</b><br>Adjusted HR (95% CI) | <b>Survival on haemodialysis</b><br>Adjusted HR (95% CI) | <b>Survival on peritoneal dialysis</b><br>Adjusted HR (95% CI) | <b>Survival after kidney transplantation</b><br>Adjusted HR (95% CI) |
|---------------------|------------------------------------------------|-----------------------------------------------------|----------------------------------------------------------|----------------------------------------------------------------|----------------------------------------------------------------------|
| All                 | 0.78 (0.74 - 0.81)                             | 0.80 (0.77 - 0.84)                                  | 0.81 (0.77 - 0.85)                                       | 0.77 (0.69 - 0.86)                                             | 0.91 (0.78 - 1.06)                                                   |
| Non-DN              | 0.80 (0.75 - 0.84)                             | 0.82 (0.77 - 0.87)                                  | 0.83 (0.78 - 0.89)                                       | 0.75 (0.64 - 0.86)                                             | 0.98 (0.82 - 1.18)                                                   |
| Unknown/<br>Missing | 0.74 (0.67 - 0.82)                             | 0.78 (0.71 - 0.87)                                  | 0.76 (0.68 - 0.86)                                       | 0.90 (0.71 - 1.16)                                             | 0.99 (0.67 - 1.47)                                                   |
| DN Both             | 0.76 (0.69 - 0.84)                             | 0.77 (0.70 - 0.85)                                  | 0.79 (0.71 - 0.89)                                       | 0.70 (0.57 - 0.87)                                             | 0.77 (0.54 - 1.10)                                                   |
| T1DN                | 0.75 (0.62 - 0.90)                             | 0.77 (0.64 - 0.93)                                  | 0.74 (0.59 - 0.93)                                       | 0.86 (0.60 - 1.25)                                             | 0.59 (0.34 - 1.01)                                                   |
| T2DN                | 0.77 (0.69 - 0.87)                             | 0.79 (0.70 - 0.88)                                  | 0.82 (0.72 - 0.94)                                       | 0.66 (0.50 - 0.86)                                             | 0.92 (0.57 - 1.50)                                                   |

Categories may not add up because of rounding off. Dialysis is defined as both peritoneal- or haemodialysis. Abbreviations: CI. confidence interval; DN, diabetic nephropathy; T1DN, type 1 DN; T2DN, type 2 DN; Tx. kidney transplantation.

C. Graft survival probabilities and crude hazard ratios (HR) and age and gender adjusted HRs of patients having a renal transplantation in the period 2000-2010.

|                       |         | <b>Adjusted 1 year survival (95% CI)</b> | <b>Adjusted 5 year survival (95% CI)</b> | <b>Unadjusted 5 year survival (95% CI)</b> | <b>Crude HR (95%CI)</b> | <b>Adjusted HR (95% CI)</b> |
|-----------------------|---------|------------------------------------------|------------------------------------------|--------------------------------------------|-------------------------|-----------------------------|
| <b>Graft survival</b> | No DN   | 90.6 (89.8 - 91.5)                       | 77.0 (75.7 - 78.3)                       | 75.8 (74.8 - 76.8)                         | 1 (ref)                 | 1 (ref)                     |
|                       | DN both | 86.7 (84.1 - 89.4)                       | 68.8 (65.1 - 72.8)                       | 65.6 (62.9 - 68.2)                         | 1.53 (1.33 - 1.75)      | 1.43 (1.25 - 1.64)          |
|                       | T1DN    | 90.7 (87.5 - 93.9)                       | 74.7 (69.9 - 79.7)                       | 74.1 (70.2 - 77.6)                         | 1.11 (0.92 - 1.34)      | 1.14 (0.95 - 1.38)          |
|                       | T2DN    | 82.4 (78.1 - 86.8)                       | 62.1 (56.4 - 68.4)                       | 54.4 (50.8 - 57.9)                         | 2.28 (1.91 - 2.73)      | 1.85 (1.54 - 2.22)          |

Categories may not add up because of rounding off. Abbreviations: CI, confidence interval; DN, diabetic nephropathy; HR, hazard ratios; T1DN, type 1 DN; T2DN, type 2 DN.
